# Supplementary material
Source: PubMed Central journal article supplement (PMC6700027)
Supplement: NIHMS1038686-supplement-Supp_info.pdf [file NIHMS1038686-supplement-Supp_info.pdf]

**Table S1.** Crystallographic data for the chelates of DOTMA with the light lanthanides. The crystallographic parameters for GdDOTMA have been published previously [Aime *et al. Inorg. Chem.* (2011), 7955].

|                                                     | CeDOTMA                                                                                                        | PrDOTMA                                                                          | NdDOTMA                                                                          | SmDOTMA                                                                          | EuDOTMA                                                                                           |
|-----------------------------------------------------|----------------------------------------------------------------------------------------------------------------|----------------------------------------------------------------------------------|----------------------------------------------------------------------------------|----------------------------------------------------------------------------------|---------------------------------------------------------------------------------------------------|
| Empirical formula                                   | C <sub>40</sub> H <sub>86</sub> Ce <sub>2</sub> Cl <sub>2</sub> N <sub>8</sub> Na <sub>4</sub> O <sub>30</sub> | C <sub>40</sub> H <sub>82</sub> ClN <sub>8</sub> O <sub>45</sub> Pr <sub>3</sub> | C <sub>40</sub> H <sub>82</sub> ClN <sub>8</sub> Nd <sub>3</sub> O <sub>25</sub> | C <sub>40</sub> H <sub>82</sub> ClN <sub>8</sub> O <sub>25</sub> Sm <sub>3</sub> | C <sub>40</sub> H <sub>100</sub> ClEu <sub>2</sub> N <sub>8</sub> Na <sub>3</sub> O <sub>34</sub> |
| Formula weight                                      | 1602.27                                                                                                        | 1835.14                                                                          | 1543.31                                                                          | 1561.64                                                                          | 1645.62                                                                                           |
| Temperature (K)                                     | 173(2)                                                                                                         | 103(2)                                                                           | 173(2)                                                                           | 173(2)                                                                           | 101(2)                                                                                            |
| Wavelength (Å)                                      | 0.71073                                                                                                        | 0.71073                                                                          | 0.71073                                                                          | 0.71073                                                                          | 0.71073                                                                                           |
| Crystal system                                      | Monoclinic                                                                                                     | Orthorhombic                                                                     | Orthorhombic                                                                     | Orthorhombic                                                                     | Orthorhombic                                                                                      |
| Space group                                         | P 2                                                                                                            | C 222 <sub>1</sub>                                                               | C 222 <sub>1</sub>                                                               | C 222 <sub>1</sub>                                                               | C 222 <sub>1</sub>                                                                                |
| <i>a</i> (Å)                                        | 9.7484(7)                                                                                                      | 13.0332(3)                                                                       | 13.1080(4)                                                                       | 13.0375(5)                                                                       | 13.2556(7)                                                                                        |
| <i>b</i> (Å)                                        | 9.6633(7)                                                                                                      | 14.3742(4)                                                                       | 14.3674(4)                                                                       | 14.3825(5)                                                                       | 13.7374(7)                                                                                        |
| <i>c</i> (Å)                                        | 18.8976(14)                                                                                                    | 39.0639(9)                                                                       | 39.0837(11)                                                                      | 39.0608(11)                                                                      | 37.126(2)                                                                                         |
| $\alpha$                                            | 90°                                                                                                            | 90°                                                                              | 90°                                                                              | 90°                                                                              | 90°                                                                                               |
| $\beta$                                             | 98.384(1)°                                                                                                     | 90°                                                                              | 90°                                                                              | 90°                                                                              | 90°                                                                                               |
| $\gamma$                                            | 90°                                                                                                            | 90°                                                                              | 90°                                                                              | 90°                                                                              | 90°                                                                                               |
| Volume (Å <sup>3</sup> )                            | 1761.2(2)                                                                                                      | 7318.3(3)                                                                        | 7360.6(4)                                                                        | 7324.4(5)                                                                        | 6760.6(6)                                                                                         |
| <i>Z</i>                                            | 1                                                                                                              | 4                                                                                | 4                                                                                | 4                                                                                | 8                                                                                                 |
| Density (calculated) (Mg/m <sup>3</sup> )           | 1.511                                                                                                          | 1.666                                                                            | 1.393                                                                            | 1.416                                                                            | 1.617                                                                                             |
| Absorption coefficient (mm <sup>-1</sup> )          | 1.457                                                                                                          | 2.104                                                                            | 2.188                                                                            | 2.477                                                                            | 1.989                                                                                             |
| <i>F</i> (000)                                      | 816                                                                                                            | 3655                                                                             | 3100                                                                             | 3124                                                                             | 3375                                                                                              |
| Crystal color, morphology                           | colourless, block                                                                                              | colourless, irregular                                                            | colourless, block                                                                | colourless, block                                                                | pale pink, prism                                                                                  |
| Crystal size (mm <sup>3</sup> )                     | 0.50 × 0.30 × 0.20                                                                                             | 0.30 × 0.20 × 0.10                                                               | 0.50 × 0.25 × 0.20                                                               | 0.50 × 0.50 × 0.35                                                               | 0.30 × 0.20 × 0.20                                                                                |
| Theta range for data collection                     | 2.11 to 27.49°                                                                                                 | 2.1 to 27.0°                                                                     | 2.08 to 25.03°                                                                   | 2.09 to 25.05°                                                                   | 3.786 to 28.485°                                                                                  |
|                                                     | -12 ≤ <i>h</i> ≤ 12                                                                                            | -17 ≤ <i>h</i> ≤ 17                                                              | -15 ≤ <i>h</i> ≤ 15                                                              | -15 ≤ <i>h</i> ≤ 15                                                              | -16 ≤ <i>h</i> ≤ 17                                                                               |
| Index ranges                                        | -12 ≤ <i>k</i> ≤ 12                                                                                            | -19 ≤ <i>k</i> ≤ 19                                                              | -16 ≤ <i>k</i> ≤ 17                                                              | -17 ≤ <i>k</i> ≤ 17                                                              | - 18 ≤ <i>k</i> ≤ 15                                                                              |
|                                                     | 0 ≤ <i>l</i> ≤ 24                                                                                              | -52 ≤ <i>l</i> ≤ 52                                                              | -46 ≤ <i>l</i> ≤ 46                                                              | -46 ≤ <i>l</i> ≤ 46                                                              | - 50 ≤ <i>l</i> ≤ 50                                                                              |
| Reflections collected                               | 20692                                                                                                          | 64287                                                                            | 33120                                                                            | 32642                                                                            | 29906                                                                                             |
| Independent reflections                             | 7915 [R(int) = 0.0279]                                                                                         | 9228 [R(int) = 0.0455]                                                           | 6507 [R(int) = 0.0439]                                                           | 6482 [R(int) = 0.0391]                                                           | 7919 [R(int) = 0.0618]                                                                            |
| Observed reflections                                | 7645                                                                                                           | 9213                                                                             | 6051                                                                             | 6306                                                                             | 7189                                                                                              |
| Completeness to theta = 25.05°                      | 99.4%                                                                                                          | 99.7%                                                                            | 99.9%                                                                            | 99.8%                                                                            | 92.8%                                                                                             |
| Absorption correction                               | Multi-scan                                                                                                     | Multi-scan                                                                       | Multi-scan                                                                       | Multi-scan                                                                       | Multi-scan                                                                                        |
| Max. and min. transmission                          | 0.75 and 0.60                                                                                                  | 1.0 and 0.8089                                                                   | 0.6687 and 0.4076                                                                | 0.4777 and 0.3706                                                                | 0.83 and 0.742                                                                                    |
| Refinement method                                   | Full-matrix least-squares on <i>F</i> <sup>2</sup>                                                             | Full-matrix least-squares on <i>F</i> <sup>2</sup>                               | Full-matrix least-squares on <i>F</i> <sup>2</sup>                               | Full-matrix least-squares on <i>F</i> <sup>2</sup>                               | Full-matrix least-squares on <i>F</i> <sup>2</sup>                                                |
| Data / restraints / parameters                      | 7915 / 1 / 395                                                                                                 | 9228 / 6 / 407                                                                   | 6507 / 0 / 340                                                                   | 6482 / 0 / 353                                                                   | 7919 / 0 / 404                                                                                    |
| Goodness-of-fit on <i>F</i> <sup>2</sup>            | 1.088                                                                                                          | 1.333                                                                            | 1.042                                                                            | 1.066                                                                            | 1.152                                                                                             |
| Final <i>R</i> indices [ <i>I</i> > 2σ( <i>I</i> )] | <i>R</i> 1 = 0.0309<br><i>wR</i> 2 = 0.0825                                                                    | <i>R</i> 1 = 0.0722<br><i>wR</i> 2 = 0.1518                                      | <i>R</i> 1 = 0.0409<br><i>wR</i> 2 = 0.0952                                      | <i>R</i> 1 = 0.0330<br><i>wR</i> 2 = 0.0904                                      | <i>R</i> 1 = 0.0724<br><i>wR</i> 2 = 0.1909                                                       |
| <i>R</i> indices (all data)                         | <i>R</i> 1 = 0.0322<br><i>wR</i> 2 = 0.0835                                                                    | <i>R</i> 1 = 0.0723<br><i>wR</i> 2 = 0.1518                                      | <i>R</i> 1 = 0.0452<br><i>wR</i> 2 = 0.0969                                      | <i>R</i> 1 = 0.0340<br><i>wR</i> 2 = 0.0909                                      | <i>R</i> 1 = 0.0796<br><i>wR</i> 2 = 0.1959                                                       |
| Absolute structure parameter                        | 0.022(12)                                                                                                      | 0.018(5)                                                                         | 0.08(2)                                                                          | 0.070(18)                                                                        | 0.12(3)                                                                                           |
| Largest diff. peak and hole                         | 1.453 and -0.833 e.Å <sup>-3</sup>                                                                             | 1.820 and -4.231 e.Å <sup>-3</sup>                                               | 1.305 and -1.081 e.Å <sup>-3</sup>                                               | 0.721 and -0.857 e.Å <sup>-3</sup>                                               | 1.816 and -2.515 e.Å <sup>-3</sup>                                                                |

**Table S2.** Crystallographic data for the chelates of DOTMA with the heavy lanthanides. The crystallographic parameters for HoDOTMA have been published previously [Payne *et al. Chem Commun.* (2013), 2320].

|                                                     | TbDOTMA                                                                                                          | DyDOTMA                                                                                            | ErDOTMA                                                                                          | TmDOTMA                                                                                          | YbDOTMA                                                                                          |
|-----------------------------------------------------|------------------------------------------------------------------------------------------------------------------|----------------------------------------------------------------------------------------------------|--------------------------------------------------------------------------------------------------|--------------------------------------------------------------------------------------------------|--------------------------------------------------------------------------------------------------|
| Empirical formula                                   | C <sub>80</sub> H <sub>160</sub> Cl <sub>4</sub> N <sub>16</sub> Na <sub>2</sub> O <sub>64</sub> Tb <sub>6</sub> | C <sub>80</sub> H <sub>128</sub> Cl <sub>2</sub> Dy <sub>6</sub> N <sub>16</sub> NaO <sub>67</sub> | C <sub>40</sub> H <sub>86</sub> ClEr <sub>2</sub> N <sub>8</sub> Na <sub>3</sub> O <sub>27</sub> | C <sub>40</sub> H <sub>84</sub> ClN <sub>8</sub> Na <sub>3</sub> O <sub>26</sub> Tm <sub>2</sub> | C <sub>40</sub> H <sub>86</sub> ClN <sub>8</sub> Na <sub>3</sub> O <sub>27</sub> Yb <sub>2</sub> |
| Formula weight                                      | 3535.01                                                                                                          | 3454.87                                                                                            | 1550.10                                                                                          | 1535.42                                                                                          | 1561.67                                                                                          |
| Temperature (K)                                     | 297(2)                                                                                                           | 296(2)                                                                                             | 297(2)                                                                                           | 298(2)                                                                                           | 173(2)                                                                                           |
| Wavelength (Å)                                      | 0.71073                                                                                                          | 0.71073                                                                                            | 0.71073                                                                                          | 0.71073                                                                                          | 0.71073                                                                                          |
| Crystal system                                      | Monoclinic                                                                                                       | Monoclinic                                                                                         | Monoclinic                                                                                       | Orthorhombic                                                                                     | Triclinic                                                                                        |
| Space group                                         | P 2 <sub>1</sub>                                                                                                 | P 2 <sub>1</sub>                                                                                   | P 2                                                                                              | C 222 <sub>1</sub>                                                                               | P 1                                                                                              |
| <i>a</i> (Å)                                        | 13.4186(2)                                                                                                       | 13.4034(4)                                                                                         | 13.1684(2)                                                                                       | 13.063(2)                                                                                        | 9.393(2)                                                                                         |
| <i>b</i> (Å)                                        | 37.0201(7)                                                                                                       | 36.9704(16)                                                                                        | 19.0482(3)                                                                                       | 13.840(2)                                                                                        | 9.405(2)                                                                                         |
| <i>c</i> (Å)                                        | 13.6498(3)                                                                                                       | 13.6578(4)                                                                                         | 13.1654(2)                                                                                       | 37.274(5)                                                                                        | 19.293(5)                                                                                        |
| $\alpha$                                            | 90°                                                                                                              | 90°                                                                                                | 90°                                                                                              | 90°                                                                                              | 81.712(4)°                                                                                       |
| $\beta$                                             | 90.293(2)°                                                                                                       | 90.236(3)°                                                                                         | 90.0550(10)°                                                                                     | 90°                                                                                              | 88.039(3)°                                                                                       |
| $\gamma$                                            | 90°                                                                                                              | 90°                                                                                                | 90°                                                                                              | 90°                                                                                              | 84.747(2)°                                                                                       |
| Volume (Å <sup>3</sup> )                            | 6780.6(2)                                                                                                        | 6767.8(4)                                                                                          | 3302.33(9)                                                                                       | 6739.1(17)                                                                                       | 1679.1(7)                                                                                        |
| <i>Z</i>                                            | 2                                                                                                                | 2                                                                                                  | 4                                                                                                | 4                                                                                                | 1                                                                                                |
| Density (calculated) (Mg/m <sup>3</sup> )           | 1.731                                                                                                            | 1.695                                                                                              | 1.559                                                                                            | 1.513                                                                                            | 1.544                                                                                            |
| Absorption coefficient (mm <sup>-1</sup> )          | 3.227                                                                                                            | 3.409                                                                                              | 2.663                                                                                            | 2.751                                                                                            | 2.905                                                                                            |
| <i>F</i> (000)                                      | 3559                                                                                                             | 3394                                                                                               | 1568                                                                                             | 3104                                                                                             | 788                                                                                              |
| Crystal color, morphology                           | colourless, prism                                                                                                | pale pink, prism                                                                                   | pink, prism                                                                                      | pink, prism                                                                                      | colourless, block                                                                                |
| Crystal size (mm <sup>3</sup> )                     | 0.78 × 0.58 × 0.16                                                                                               | 0.40 × 0.20 × 0.20                                                                                 | 0.25 × 0.25 × 0.20                                                                               | 0.30 × 0.30 × 0.30                                                                               | 0.50 × 0.20 × 0.20                                                                               |
| Theta range for data collection                     | 3 to 28°                                                                                                         | 2.1 to 27.5°                                                                                       | 3.447 to 32.216°                                                                                 | 3.503 to 23.964°                                                                                 | 2.13 to 26.42°                                                                                   |
|                                                     | -18 ≤ <i>h</i> ≤ 19                                                                                              | -19 ≤ <i>h</i> ≤ 14                                                                                | -19 ≤ <i>h</i> ≤ 18                                                                              | - 16 ≤ <i>h</i> ≤ 16                                                                             | -11 ≤ <i>h</i> ≤ 11                                                                              |
| Index ranges                                        | - 51 ≤ <i>k</i> ≤ 53                                                                                             | - 29 ≤ <i>k</i> ≤ 54                                                                               | -28 ≤ <i>k</i> ≤ 23                                                                              | - 12 ≤ <i>k</i> ≤ 17                                                                             | -11 ≤ <i>k</i> ≤ 11                                                                              |
|                                                     | - 20 ≤ <i>l</i> ≤ 19                                                                                             | - 15 ≤ <i>l</i> ≤ 20                                                                               | -18 ≤ <i>l</i> ≤ 19                                                                              | - 45 ≤ <i>l</i> ≤ 45                                                                             | -24 ≤ <i>l</i> ≤ 24                                                                              |
| Reflections collected                               | 46091                                                                                                            | 29993                                                                                              | 43429                                                                                            | 14851                                                                                            | 18344                                                                                            |
| Independent reflections                             | 35954 [R(int) = 0.0284]                                                                                          | 22913 [R(int) = 0.0359]                                                                            | 17447 [R(int) = 0.0232]                                                                          | 6421 [R(int) = 0.1358]                                                                           | 13282 [R(int) = 0.0215]                                                                          |
| Observed reflections                                | 32762                                                                                                            | 22046                                                                                              | 15451                                                                                            | 5812                                                                                             | 12673                                                                                            |
| Completeness to theta = 25.05°                      | 92.2%                                                                                                            | 89.8%                                                                                              | 93.5%                                                                                            | 99.3%                                                                                            | 99.4%                                                                                            |
| Absorption correction                               | Analytical, 8 faces                                                                                              | Multi-scan                                                                                         | Analytical, 8 faces                                                                              | Multi-scan                                                                                       | Multi-scan                                                                                       |
| Max. and min. transmission                          | 0.586 and 0.158                                                                                                  | 1.0 and 0.468                                                                                      | 0.359 and 0.260                                                                                  | 1.0 and 0.481                                                                                    | 0.5942 and 0.3245                                                                                |
| Refinement method                                   | Full-matrix least-squares on <i>F</i> <sup>2</sup>                                                               | Full-matrix least-squares on <i>F</i> <sup>2</sup>                                                 | Full-matrix least-squares on <i>F</i> <sup>2</sup>                                               | Full-matrix least-squares on <i>F</i> <sup>2</sup>                                               | Full-matrix least-squares on <i>F</i> <sup>2</sup>                                               |
| Data / restraints / parameters                      | 35954 / 1 / 1517                                                                                                 | 22911 / 1 / 1479                                                                                   | 17447 / 1 / 428                                                                                  | 6421 / 241 / 378                                                                                 | 13282 / 4 / 741                                                                                  |
| Goodness-of-fit on <i>F</i> <sup>2</sup>            | 1.053                                                                                                            | 1.173                                                                                              | 1.066                                                                                            | 1.679                                                                                            | 1.033                                                                                            |
| Final <i>R</i> indices [ <i>I</i> > 2σ( <i>I</i> )] | R1 = 0.0660<br>wR2 = 0.1508                                                                                      | R1 = 0.0769<br>wR2 = 0.1833                                                                        | R1 = 0.0360<br>wR2 = 0.0919                                                                      | R1 = 0.1705<br>wR2 = 0.4116                                                                      | R1 = 0.0360<br>wR2 = 0.0919                                                                      |
| <i>R</i> indices (all data)                         | R1 = 0.0722<br>wR2 = 0.1548                                                                                      | R1 = 0.0790<br>wR2 = 0.1848                                                                        | R1 = 0.0360<br>wR2 = 0.0919                                                                      | R1 = 0.1633<br>wR2 = 0.4072                                                                      | R1 = 0.0382<br>wR2 = 0.0938                                                                      |
| Absolute structure parameter                        | 0.080(12)                                                                                                        | 0.061(11)                                                                                          | 0.006(10)                                                                                        | 0.21(6)                                                                                          | 0.071(9)                                                                                         |
| Largest diff. peak and hole                         | 2.274 and -2.930 e.Å <sup>-3</sup>                                                                               | 2.653 and -3.544 e.Å <sup>-3</sup>                                                                 | 1.873 and -1.725 e.Å <sup>-3</sup>                                                               | 3.313 and -3.572 e.Å <sup>-3</sup>                                                               | 1.946 and -1.169 e.Å <sup>-3</sup>                                                               |

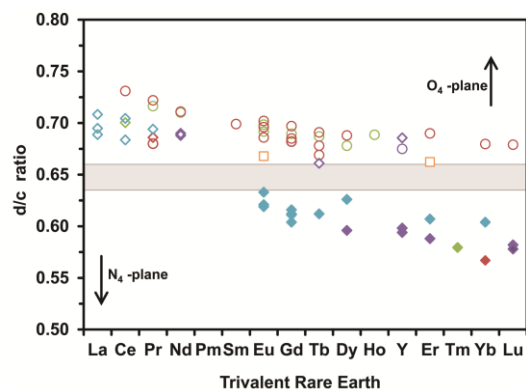

**Figure S1.** The position of the  $\text{Ln}^{3+}$  ion relative to the  $\text{N}_4$  and  $\text{O}_4$  planes (the d/c ratio) in the crystal structures of various of DOTA-type chelates. Open symbols represents chelates in which a coordinated water molecule was identified, the closed symbols chelates in which no coordinated water molecule was identified.

| Circles: SAP | Diamonds: TSAP |
|--------------|----------------|
| Acetates     | Green          |
| Amides       | Red            |
| Pyridyls     | Orange         |
| Phosphinates | Blue           |
| Phosphonates | Purple         |

**Table S3.** Selected parameters from the crystal structures of the LnDOTMA chelates.

| Ln Ion | Space Group | Metal Ion Label | q | Ln-OH <sub>2</sub> | d (Å) | c (Å) | d/c  | O4 Area (Å <sup>2</sup> ) | O-Ln-O °      | Ave    |
|--------|-------------|-----------------|---|--------------------|-------|-------|------|---------------------------|---------------|--------|
| Ce     | P2          | 1               | 1 | 2.565              | 1.719 | 2.477 | 0.69 | 10.91                     | 144.20 143.99 | 144.10 |
| Pr     | C2221       | 1               | 1 | 2.598              | 1.662 | 2.479 | 0.67 | 10.49                     | 141.67 139.75 | 140.71 |
| Nd     | C2221       | 1               | 1 | 2.563              | 1.651 | 2.478 | 0.67 | 10.44                     | 141.01 139.35 | 140.18 |
| Pm     |             |                 |   |                    |       |       |      |                           |               |        |
| Sm     | C2221       | 1               | 1 | 2.511              | 1.633 | 2.470 | 0.66 | 10.10                     | 140.06 138.23 | 139.15 |
| Eu     | C2221       | 1               | 1 | 2.584              | 1.624 | 2.449 | 0.66 | 9.93                      | 139.15 139.59 | 139.37 |
| Gd     | P2          | 1               | 1 | 2.500              | 1.663 | 2.457 | 0.68 | 9.99                      | 140.86 140.87 | 140.87 |
| Tb     | P21         | 1               | 1 | 2.592              | 1.618 | 2.483 | 0.65 | 9.50                      | 136.55 136.76 | 136.66 |
|        |             | 2               | 1 | 2.617              | 1.599 | 2.480 | 0.64 | 9.44                      | 135.85 135.62 | 135.74 |
|        |             | 3               | 1 | 2.569              | 1.618 | 2.469 | 0.66 | 9.66                      | 137.78 137.60 | 137.69 |
|        |             | 4               | 1 | 2.628              | 1.569 | 2.494 | 0.63 | 9.24                      | 133.15 133.70 | 133.43 |
| Dy     | P21         | 2               | 1 | 2.550              | 1.601 | 2.453 | 0.65 | 9.68                      | 137.45 137.89 | 137.67 |
|        |             | 3               | 1 | 2.606              | 1.602 | 2.482 | 0.65 | 9.36                      | 136.47 134.89 | 135.68 |
|        |             | 5               | 0 | -                  | 1.514 | 2.501 | 0.61 | 8.78                      | 129.81 129.33 | 129.57 |
|        |             | 6               | 1 | 2.659              | 1.568 | 2.482 | 0.63 | 9.13                      | 133.44 133.65 | 133.55 |
| Ho     | C222        | 1               | 1 | 2.662              | 1.581 | 2.460 | 0.64 | 9.14                      | 135.25 135.38 | 135.32 |
|        |             | 2               | 0 | -                  | 1.469 | 2.493 | 0.59 | 8.51                      | 127.16 127.30 | 127.23 |
| Er     | P2          | 1               | 0 | (2.902)            | 1.556 | 2.479 | 0.63 | 8.88                      | 132.64 132.76 | 132.70 |
|        |             | 2               | 0 | -                  | 1.456 | 2.493 | 0.58 | 8.44                      | 126.22 126.22 | 126.22 |
|        |             | 3               | 0 | -                  | 1.453 | 2.501 | 0.58 | 8.38                      | 126.22 125.69 | 125.96 |
|        |             | 4               | 1 | 2.732              | 1.551 | 2.465 | 0.63 | 8.95                      | 133.37 133.14 | 133.26 |
| Tm     | C2221       | 1               | 0 | -                  | 1.413 | 2.453 | 0.58 | 8.00                      | 122.05 128.39 | 125.22 |
| Yb     | P1          | 1               | 0 | -                  | 1.439 | 2.515 | 0.57 | 7.90                      | 124.92 122.65 | 123.79 |
|        |             | 2               | 0 | -                  | 1.425 | 2.494 | 0.57 | 7.91                      | 122.39 124.57 | 123.48 |

**Table S4.** Selected parameters from the crystal structures of the LnDOTMA chelates.

| Ln Ion | Metal Ion Label | Chelate Torsion Angle (°) |        |        |        |        | Ave | N-C-C-O Torsion (°) |        |        |        |        | Ave |
|--------|-----------------|---------------------------|--------|--------|--------|--------|-----|---------------------|--------|--------|--------|--------|-----|
| Ce     | 1               | -25.17                    | -25.26 | -25.88 | -25.20 | -25.38 |     | -14.69              | -14.53 | -15.59 | -35.40 | -20.05 |     |
| Pr     | 1               | -25.62                    | -26.78 | -25.20 | -25.38 | -25.75 |     | -28.43              | -9.74  | -19.57 | -34.11 | -22.96 |     |
| Nd     | 1               | -25.45                    | -25.85 | -25.56 | -26.63 | -25.87 |     | -17.21              | -11.94 | -29.32 | -26.44 | -21.23 |     |
| Pm     |                 |                           |        |        |        |        |     |                     |        |        |        |        |     |
| Sm     | 1               | -24.70                    | -25.20 | -24.28 | -26.14 | -25.08 |     | -28.08              | -12.60 | -19.94 | -26.14 | -21.69 |     |
| Eu     | 1               | -27.89                    | -25.98 | -27.59 | -27.35 | -27.20 |     | -23.45              | -14.62 | -12.86 | -13.19 | -16.03 |     |
| Gd     | 1               | -25.10                    | -27.14 | -26.71 | -25.41 | -26.09 |     | -16.66              | -13.63 | -16.14 | -28.68 | -18.78 |     |
| Tb     | 1               | -25.47                    | -26.74 | -25.78 | -24.70 | -25.67 |     | -15.10              | -22.99 | -27.47 | -17.64 | -20.80 |     |
|        | 2               | -27.61                    | -25.52 | -24.66 | -23.20 | -25.25 |     | -24.44              | -11.82 | -27.52 | -19.63 | -20.85 |     |
|        | 3               | -25.91                    | -25.55 | -25.84 | -25.67 | -25.74 |     | -34.58              | -25.63 | -19.75 | -14.14 | -23.53 |     |
|        | 4               | -24.95                    | -26.35 | -25.75 | -25.86 | -25.73 |     | -16.74              | -19.46 | -26.37 | -33.42 | -24.00 |     |
| Dy     | 2               | -26.77                    | -25.32 | -25.99 | -25.13 | -25.80 |     | -24.82              | -21.66 | -15.80 | -35.24 | -24.38 |     |
|        | 3               | -25.98                    | -26.88 | -25.40 | -25.53 | -25.95 |     | -14.19              | -27.20 | -23.37 | -13.54 | -19.58 |     |
|        | 5               | -25.91                    | -25.98 | -25.52 | -25.75 | -25.79 |     | -20.28              | -24.45 | -25.58 | -32.39 | -25.68 |     |
|        | 6               | -26.30                    | -27.11 | -24.43 | -24.18 | -25.51 |     | -23.55              | -17.98 | -30.61 | -32.57 | -26.18 |     |
| Ho     | 1               | -24.75                    | -25.26 | -25.11 | -24.87 | -25.00 |     | -19.18              | -21.30 | -21.30 | -19.18 | -20.24 |     |
|        | 2               | -25.32                    | -25.32 | -25.45 | -25.46 | -25.39 |     | -23.41              | -23.22 | -23.41 | -23.22 | -23.32 |     |
| Er     | 1               | -25.64                    | -25.69 | -25.64 | -25.59 | -25.64 |     | -26.24              | -26.27 | -26.24 | -26.15 | -26.23 |     |
|        | 2               | -25.26                    | -25.49 | -25.26 | -25.49 | -25.38 |     | -23.90              | -23.97 | -23.9  | -23.97 | -23.94 |     |
|        | 3               | -25.50                    | -25.38 | -25.50 | -25.38 | -25.44 |     | -23.99              | -24.43 | -23.99 | -24.43 | -24.21 |     |
|        | 4               | -26.26                    | -26.03 | -26.01 | -26.23 | -26.13 |     | -20.83              | -19.71 | -20.83 | -19.71 | -20.27 |     |
| Tm     | 1               | -30.38                    | -32.77 | -29.23 | -33.01 | -31.35 |     | -8.83               | -7.37  | -9.28  | -19.98 | -11.37 |     |
| Yb     | 1               | -26.34                    | -25.43 | -24.99 | -24.28 | -25.26 |     | -25.66              | -22.87 | -14.66 | -23.54 | -21.68 |     |
|        | 2               | -24.95                    | -26.66 | -24.57 | -24.65 | -25.21 |     | -19.30              | -6.31  | -24.27 | -25.52 | -18.85 |     |

**Table S5.** Selected parameters from the crystal structures of the LnDOTMA chelates.

| Ln Ion | Metal Ion Label | N-C-C-N Torsion (°) |        |        |        | Ave    | Ln-Cl Distance (Å) |
|--------|-----------------|---------------------|--------|--------|--------|--------|--------------------|
| Ce     | 1               | -60.23              | -61.33 | -59.18 | -60.51 | -60.31 | 5.979              |
| Pr     | 1               | -61.85              | -60.02 | -58.18 | -59.39 | -59.86 | 5.933              |
| Nd     | 1               | -60.85              | -60.34 | -59.74 | -61.44 | -60.59 | 5.933              |
| Pm     |                 |                     |        |        |        |        |                    |
| Sm     | 1               | -60.14              | -59.72 | -61.77 | -61.43 | -60.77 | 5.921              |
| Eu     | 1               | -62.20              | -61.40 | -56.69 | -59.99 | -60.07 | 5.880              |
| Gd     | 1               | -59.73              | -60.56 | -59.31 | -59.23 | -59.71 | 5.935              |
| Tb     | 1               | -60.33              | -59.93 | -63.79 | -59.88 | -60.98 | 5.938              |
|        | 2               | -55.89              | -56.58 | -60.17 | -60.27 | -58.23 | 5.911              |
|        | 3               | -60.86              | -58.35 | -62.60 | -58.82 | -60.16 | 5.934              |
|        | 4               | -58.98              | -58.77 | -58.47 | -57.82 | -58.51 | 5.860              |
| Dy     | 2               | -56.11              | -57.36 | -61.97 | -56.45 | -57.97 | 5.926              |
|        | 3               | -57.21              | -60.69 | -65.77 | -60.69 | -61.09 | 5.948              |
|        | 5               | -61.41              | -59.10 | -54.24 | -59.39 | -58.54 | 5.807              |
|        | 6               | -58.88              | -59.81 | -60.45 | -57.19 | -59.08 | 5.880              |
| Ho     | 1               | -58.94              | -59.22 | -58.94 | -59.22 | -59.08 | 5.868              |
|        | 2               | -58.63              | -59.30 | -58.63 | -59.30 | -58.97 | 5.705              |
| Er     | 1               | -57.83              | -59.14 | -57.83 | -59.14 | -58.49 | 5.849              |
|        | 2               | -59.05              | -59.72 | -59.05 | -59.72 | -59.39 | 5.731              |
|        | 3               | -59.11              | -56.75 | -59.11 | -56.75 | -57.93 | 5.702              |
|        | 4               | -58.27              | -57.63 | -58.27 | -57.63 | -57.95 | 5.826              |
| Tm     | 1               | -57.71              | -52.67 | -54.93 | -44.17 | -52.37 | 5.701              |
| Yb     | 1               | -57.92              | -59.43 | -58.53 | -57.91 | -58.45 | 5.710              |
|        | 2               | -57.39              | -54.06 | -56.43 | -59.91 | -56.95 | 5.750              |

**Table S6.** Selected parameters from the crystal structures of the LnDOTMA chelates.

| Ln Ion | Metal Ion Label | Calc'd IR (Å) | Calc'd CN | N-Ln Distance (Å) |       |       |       |       | Ave | O-Ln Distance (Å) |       |       |       | Ave   |
|--------|-----------------|---------------|-----------|-------------------|-------|-------|-------|-------|-----|-------------------|-------|-------|-------|-------|
| Ce     | 1               | 1.176         | 8.63      | 2.726             | 2.716 | 2.765 | 2.740 | 2.737 |     | 2.454             | 2.437 | 2.454 | 2.477 | 2.456 |
| Pr     | 1               | 1.147         | 8.39      | 2.706             | 2.681 | 2.683 | 2.732 | 2.701 |     | 2.462             | 2.428 | 2.449 | 2.393 | 2.433 |
| Nd     | 1               | 1.141         | 8.58      | 2.703             | 2.690 | 2.673 | 2.696 | 2.691 |     | 2.436             | 2.416 | 2.463 | 2.407 | 2.431 |
| Pm     |                 |               |           |                   |       |       |       |       |     |                   |       |       |       |       |
| Sm     | 1               | 1.115         | 8.69      | 2.687             | 2.673 | 2.661 | 2.668 | 2.672 |     | 2.411             | 2.361 | 2.426 | 2.396 | 2.399 |
| Eu     | 1               | 1.091         | 8.47      | 2.659             | 2.652 | 2.670 | 2.603 | 2.646 |     | 2.402             | 2.360 | 2.390 | 2.355 | 2.377 |
| Gd     | 1               | 1.107         | 9.00      | 2.674             | 2.659 | 2.704 | 2.686 | 2.681 |     | 2.391             | 2.369 | 2.373 | 2.358 | 2.373 |
| Tb     | 1               | 1.079         | 8.70      | 2.651             | 2.653 | 2.646 | 2.656 | 2.652 |     | 2.349             | 2.353 | 2.323 | 2.357 | 2.346 |
|        | 2               | 1.071         | 8.55      | 2.592             | 2.672 | 2.639 | 2.636 | 2.635 |     | 2.364             | 2.329 | 2.358 | 2.334 | 2.346 |
|        | 3               | 1.085         | 8.82      | 2.662             | 2.660 | 2.628 | 2.663 | 2.653 |     | 2.367             | 2.349 | 2.359 | 2.352 | 2.357 |
|        | 4               | 1.062         | 8.40      | 2.609             | 2.606 | 2.640 | 2.640 | 2.624 |     | 2.366             | 2.305 | 2.322 | 2.369 | 2.341 |
| Dy     | 2               | 1.080         | 8.94      | 2.607             | 2.644 | 2.630 | 2.679 | 2.640 |     | 2.334             | 2.359 | 2.369 | 2.377 | 2.360 |
|        | 3               | 1.069         | 8.76      | 2.642             | 2.644 | 2.622 | 2.663 | 2.643 |     | 2.348             | 2.342 | 2.334 | 2.320 | 2.336 |
|        | 5               | 1.032         | 8.08      | 2.586             | 2.569 | 2.601 | 2.592 | 2.587 |     | 2.315             | 2.320 | 2.334 | 2.297 | 2.317 |
|        | 6               | 1.055         | 8.49      | 2.639             | 2.613 | 2.609 | 2.635 | 2.624 |     | 2.304             | 2.332 | 2.331 | 2.333 | 2.325 |
| Ho     | 1               | 1.043         | 8.49      | 2.616             | 2.612 | 2.616 | 2.612 | 2.614 |     | 2.314             | 2.309 | 2.309 | 2.314 | 2.312 |
|        | 2               | 1.006         | 7.84      | 2.547             | 2.552 | 2.547 | 2.552 | 2.550 |     | 2.300             | 2.305 | 2.300 | 2.305 | 2.303 |
| Er     | 1               | 1.030         | 8.45      | 2.603             | 2.596 | 2.596 | 2.603 | 2.600 |     | 2.302             | 2.299 | 2.302 | 2.299 | 2.301 |
|        | 2               | 1.000         | 7.93      | 2.546             | 2.548 | 2.546 | 2.548 | 2.547 |     | 2.297             | 2.288 | 2.297 | 2.288 | 2.293 |
|        | 3               | 1.005         | 8.02      | 2.543             | 2.544 | 2.543 | 2.544 | 2.544 |     | 2.300             | 2.313 | 2.300 | 2.313 | 2.307 |
|        | 4               | 1.031         | 8.46      | 2.595             | 2.600 | 2.595 | 2.600 | 2.598 |     | 2.301             | 2.307 | 2.301 | 2.307 | 2.304 |
| Tm     | 1               | 0.969         | 7.56      | 2.518             | 2.499 | 2.507 | 2.532 | 2.514 |     | 2.268             | 2.273 | 2.315 | 2.197 | 2.263 |
| Yb     | 1               | 0.983         | 7.97      | 2.525             | 2.539 | 2.504 | 2.518 | 2.522 |     | 2.286             | 2.293 | 2.286 | 2.275 | 2.285 |
|        | 2               | 0.964         | 7.63      | 2.505             | 2.501 | 2.512 | 2.524 | 2.511 |     | 2.244             | 2.245 | 2.285 | 2.255 | 2.257 |

**Table S7.** Selected parameters from the crystal structures of the LnDOTMA chelates: Ln- $ax^S$  and Ln-ac are the distance between the Ln<sup>3+</sup> ion and the axial proton on the side carbon and the acetate proton, respectively.

| Ln Ion | Metal Ion Label | q | Ln-OH <sub>2</sub> | Ln- $ax^S$ Distance (Å) |       |       |       |       | Ln-ac Distance (Å) |       |       |       |       |
|--------|-----------------|---|--------------------|-------------------------|-------|-------|-------|-------|--------------------|-------|-------|-------|-------|
|        |                 |   |                    |                         |       |       |       | Ave   |                    |       |       |       | Ave   |
| Ce     | 1               | 1 | 2.565              | 3.848                   | 3.784 | 3.824 | 3.808 | 3.816 | 3.346              | 3.539 | 3.522 | 3.564 | 3.493 |
| Pr     | 1               | 1 | 2.598              | 3.781                   | 3.872 | 3.753 | 3.697 | 3.776 | 3.440              | 3.640 | 3.579 | 3.466 | 3.531 |
| Nd     | 1               | 1 | 2.563              | 3.780                   | 3.750 | 3.715 | 3.714 | 3.740 | 3.553              | 3.532 | 3.356 | 3.461 | 3.476 |
| Pm     |                 |   |                    |                         |       |       |       |       |                    |       |       |       |       |
| Sm     | 1               | 1 | 2.511              | 3.717                   | 3.723 | 3.759 | 3.683 | 3.721 | 3.545              | 3.399 | 3.355 | 3.436 | 3.434 |
| Eu     | 1               | 1 | 2.584              | 3.714                   | 3.764 | 3.687 | 3.718 | 3.721 | 3.480              | 3.436 | 3.531 | 3.331 | 3.445 |
| Gd     | 1               | 1 | 2.500              | 3.762                   | 3.784 | 3.755 | 3.793 | 3.774 | 3.460              | 3.478 | 3.295 | 3.500 | 3.433 |
| Tb     | 1               | 1 | 2.592              | 3.735                   | 3.654 | 3.705 | 3.667 | 3.690 | 3.486              | 3.419 | 3.321 | 3.465 | 3.423 |
|        | 2               | 1 | 2.617              | 3.648                   | 3.727 | 3.736 | 3.739 | 3.713 | 3.372              | 3.322 | 3.541 | 3.378 | 3.403 |
|        | 3               | 1 | 2.569              | 3.736                   | 3.682 | 3.666 | 3.719 | 3.701 | 3.334              | 3.398 | 3.425 | 3.497 | 3.414 |
|        | 4               | 1 | 2.628              | 3.660                   | 3.707 | 3.655 | 3.709 | 3.683 | 3.365              | 3.388 | 3.458 | 3.285 | 3.374 |
| Dy     | 2               | 1 | 2.550              | 3.725                   | 3.751 | 3.667 | 3.652 | 3.699 | 3.365              | 3.411 | 3.309 | 3.375 | 3.365 |
|        | 3               | 1 | 2.606              | 3.707                   | 3.671 | 3.684 | 3.659 | 3.680 | 3.485              | 3.450 | 3.348 | 3.426 | 3.427 |
|        | 5               | 0 | -                  | 3.644                   | 3.675 | 3.660 | 3.628 | 3.652 | 3.340              | 3.359 | 3.463 | 3.298 | 3.365 |
|        | 6               | 1 | 2.659              | 3.658                   | 3.749 | 3.640 | 3.707 | 3.689 | 3.381              | 3.380 | 3.537 | 3.351 | 3.412 |
| Ho     | 1               | 1 | 2.662              | 3.695                   | 3.685 | 3.695 | 3.685 | 3.690 | 3.399              | 3.410 | 3.399 | 3.410 | 3.405 |
|        | 2               | 0 | -                  | 3.621                   | 3.596 | 3.596 | 3.621 | 3.609 | 3.333              | 3.324 | 3.333 | 3.324 | 3.329 |
| Er     | 1               | 0 | (2.902)            | 3.664                   | 3.668 | 3.664 | 3.668 | 3.666 | 3.402              | 3.385 | 3.402 | 3.385 | 3.394 |
|        | 2               | 0 | -                  | 3.604                   | 3.605 | 3.605 | 3.604 | 3.605 | 3.346              | 3.328 | 3.346 | 3.328 | 3.337 |
|        | 3               | 0 | -                  | 3.615                   | 3.601 | 3.615 | 3.601 | 3.608 | 3.343              | 3.329 | 3.343 | 3.329 | 3.336 |
|        | 4               | 1 | 2.732              | 3.650                   | 3.658 | 3.650 | 3.658 | 3.654 | 3.398              | 3.398 | 3.398 | 3.398 | 3.398 |
| Tm     | 1               | 0 | -                  | 3.528                   | 3.704 | 3.613 | 3.551 | 3.599 | 3.312              | 3.256 | 3.443 | 3.392 | 3.351 |
| Yb     | 1               | 0 | -                  | 3.557                   | 3.571 | 3.603 | 3.620 | 3.588 | 3.341              | 3.407 | 3.391 | 3.309 | 3.362 |
|        | 2               | 0 | -                  | 3.626                   | 3.583 | 3.561 | 3.569 | 3.585 | 3.344              | 3.467 | 3.360 | 3.268 | 3.360 |



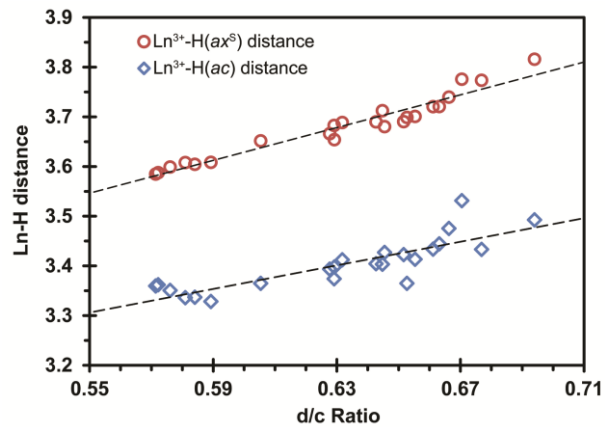

**Figure S2.** The variation of in the  $\text{Ln}^{3+}\text{-H}$  distance with d/c ratio (chelates hydration) is different for the axial proton on the side carbon ( $ax^S$ ) and the acetate proton ( $ac$ ), consistent with previous solution state observations (Webber *et al. Dalton Trans.* (2014) 251).
